# Supplementary material for: Electroanalytical study of five carbosilane dendrimers at the interface between two immiscible electrolyte solutions
Source: Royal Society of Chemistry journal article supplement (doi:10.1039/d0an02101f), 2020-12-11
Supplement: d0an02101f1.pdf [file d0an02101f1.pdf]

## Electronic supporting information

### Electroanalytical study of a family of carbosilane dendrimers at the interface between two immiscible electrolyte solutions

Karolina Kowalewska<sup>a</sup>, Tamara Rodriguez-Prieto,<sup>b,c,d</sup> Slawomira Skrzypek,<sup>a</sup> Jesús Cano,<sup>b,c,d</sup> Rafael Gómez Ramírez,<sup>b,c,d\*</sup> Lukasz Poltorak<sup>a\*</sup>

- a. *Department of Inorganic and Analytical Chemistry, Electroanalysis and Electrochemistry Group, Faculty of Chemistry, University of Lodz, Tamka 12, 91-403 Lodz, Poland.*
- b. *Department of Organic and Inorganic Chemistry, Chemical Research Institute “Andrés M. Del Río” (IQAR), University of Alcalá, 28805 Madrid, Spain.*
- c. *Ramón y Cajal Health Research Institute (IRYCIS), 28034 Madrid, Spain.*
- d. *Networking Research Center on Bioengineering, Biomaterials and Nanomedicine (CIBER-BBN), 28029 Madrid, Spain.*

**\*Corresponding author:** [lukasz.poltorak@chemia.uni.lodz.pl](mailto:lukasz.poltorak@chemia.uni.lodz.pl)

**\*Corresponding author:** [rafael.gomez@uah.es](mailto:rafael.gomez@uah.es)

**Table 1.** The summary of the experimental results of the diffusion ordered spectroscopy-NMR study. Hydrodynamic radii was calculated using Einstein-Stokes equation. MeOH stands for methanol.

| Compound | Diffusion coefficient / $\text{m}^2\text{s}^{-1}$ | Hydrodynamic radii / nm | Solvent          | Temperature (K) |
|----------|---------------------------------------------------|-------------------------|------------------|-----------------|
| BDTR1    | $2.9 \cdot 10^{-10}$                              | 0.9                     | D <sub>2</sub> O | 298             |
| BDTR2    | $5.3 \cdot 10^{-10}$                              | 0.7                     | MeOH             | 298             |
| BDTR3    | $1.4 \cdot 10^{-10}$                              | 1.8                     | D <sub>2</sub> O | 298             |
| BDTR4    | $3.9 \cdot 10^{-10}$                              | 0.9                     | MeOH             | 298             |
| BDTR5    | $1.1 \cdot 10^{-10}$                              | 2.3                     | D <sub>2</sub> O | 298             |

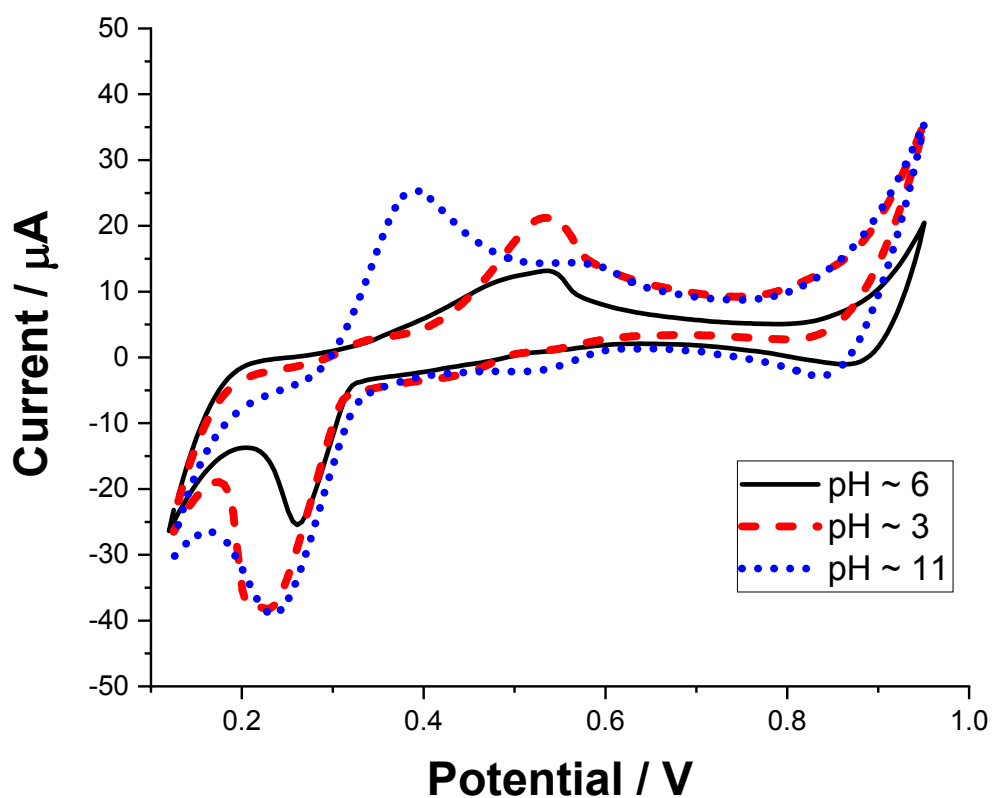

**Figure ESI1.** Ion transfer voltammograms recorded for the BDTR-5 at different pH values. Scan rate was set to  $20 \text{ mV}\cdot\text{s}^{-1}$ .  $[\text{BDTR-5}] = 100 \text{ }\mu\text{M}$ .

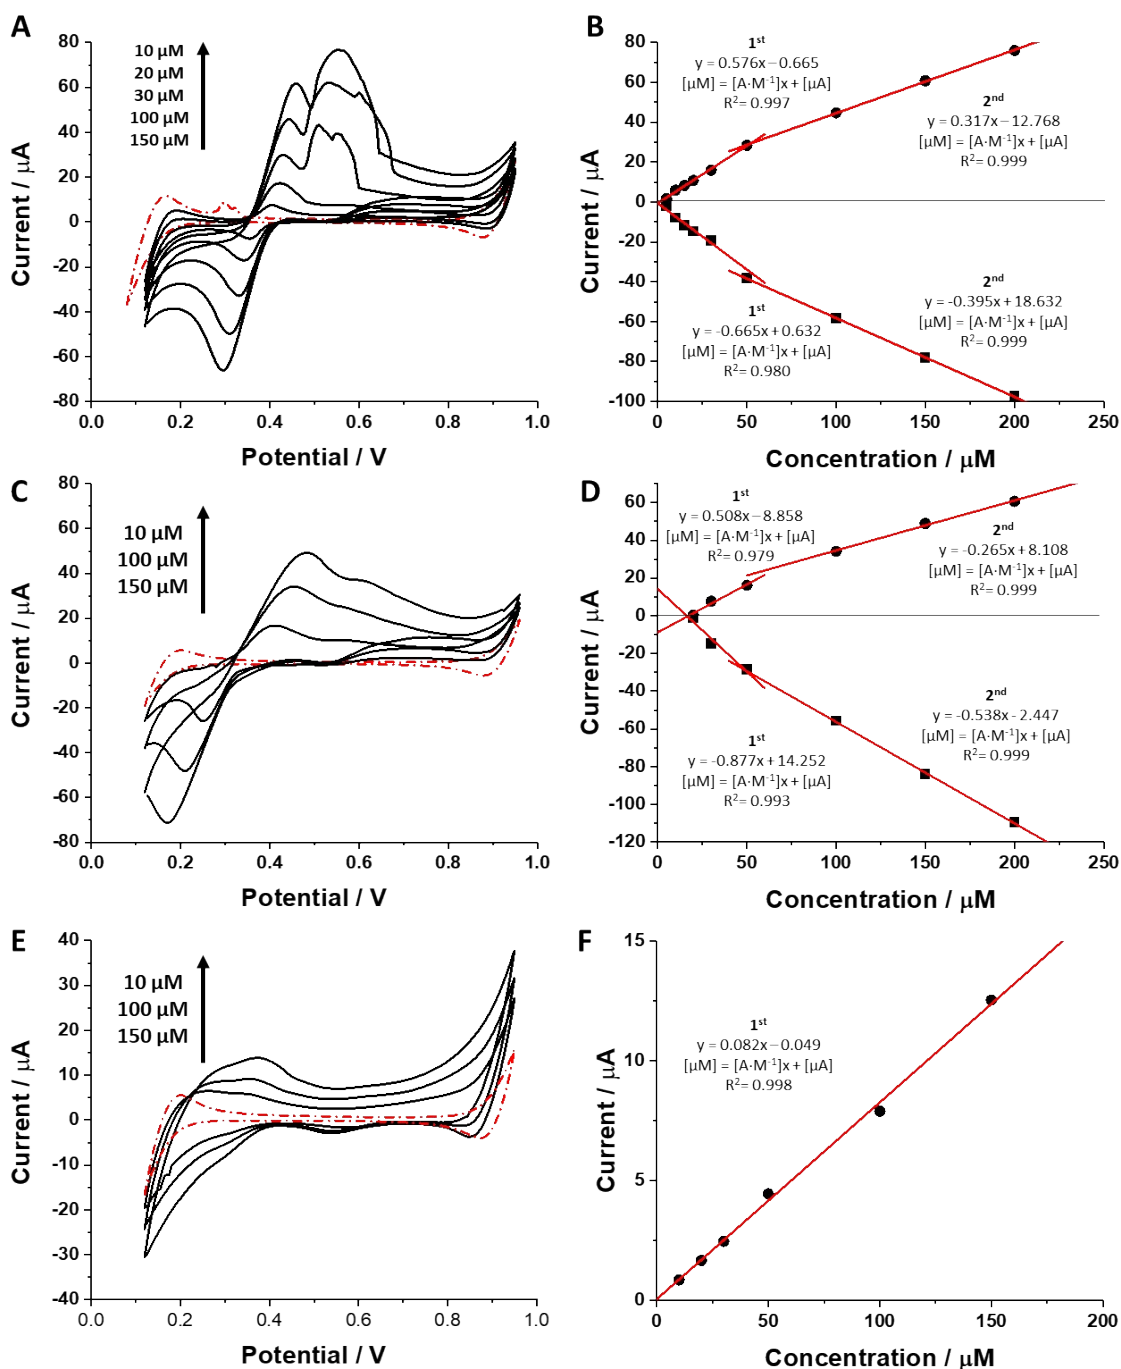

**Figure ES12.** Ion transfer voltammograms (A, C and E) recorded at different concentrations and corresponding calibration curves for the BDTR-1 (A and B), BDTR-3 (C and D) and BDTR-4 (E and F) dendrimers. Red dash-dot line is the blank recorded in the absence of dendrimers. Scan rate was equal to  $20 \text{ mV}\cdot\text{s}^{-1}$ . Linear fit equations are displayed next to calibration curves.

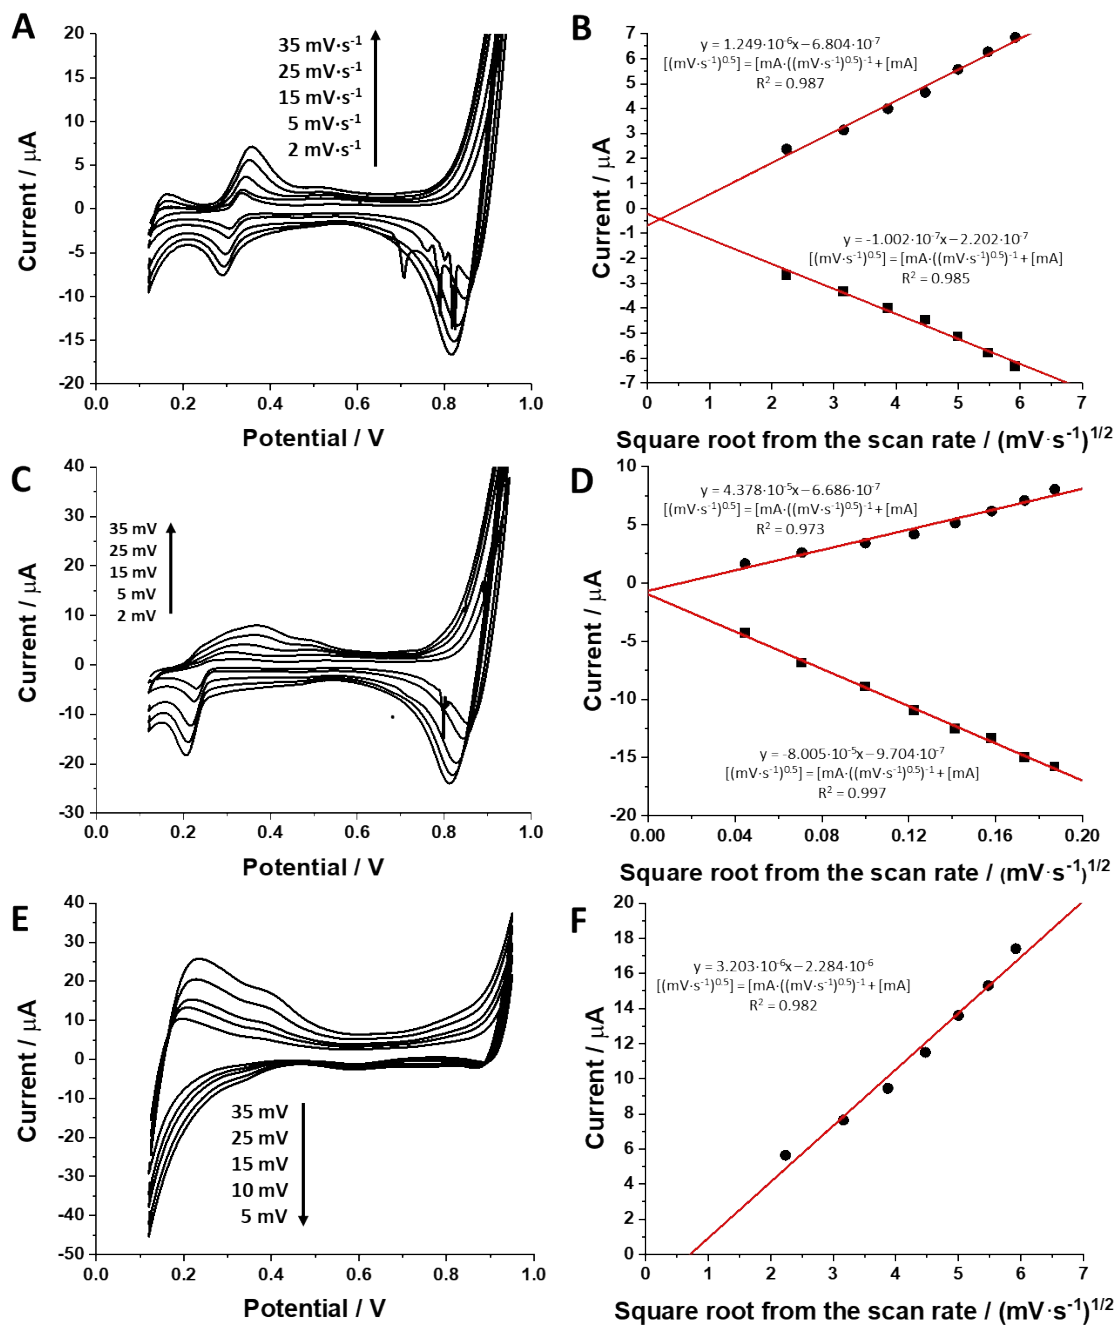

**Figure ESI 3.** A, C and E are ion transfer voltammograms recorded at indicated scan rate values. B, D and F show current versus square root from the scan rate dependencies. Graphs A and B correspond to BDTR-1 (20  $\mu\text{M}$ ); C and D to BDTR-3 (50  $\mu\text{M}$ ) and E and F to BDTR-4 (50  $\mu\text{M}$ ) dendrimer. Linear fit equation are displayed next to the corresponding experimental data points.
